# Supplementary material for: Effects of atmospheric pressure plasma jet operating with DBD on Lavatera thuringiaca L. seeds’ germination
Source: PLoS One. 2018 Apr 9;13(4):e0194349. doi: 10.1371/journal.pone.0194349 (PMC5890984; doi:10.1371/journal.pone.0194349)
Supplement: S1 File — (XLS) [file pone.0194349.s001.xls]

## Sheet: Averaged DBD plasma jet seeds
											Germination energy											Germination capacity
	Day:	1	2	3	4	5	6	7	8	9	10	11	12	13	14	15	16	17	18	19	20	21
	DBD1_1	4	12	18	20	24	26.5	31.5	33.5	34.5	35.5	35.5	35.5	35.5	35.5	35.5	35.5	35.5	35.5	35.5	35.5	36.5
	DBD1_2	3	19.5	25.5	29	36	37.5	40.5	42.5	43	43	45	46	46	46.5	46.5	46.5	46.5	46.5	47.5	47.5	47.5
	DBD1_3	5	18	22.5	24.5	27.5	29	33	36	38	39	39	41	41	41	42	42	45	45	45	46	46
	DBD1_4	2.5	12	15.5	18	21.5	23.5	28	29	31	31.5	31.5	32.5	34.5	35.5	35.5	36.5	38.5	38.5	39.5	39.5	39.5
	Average	3.625	15.375	20.375	22.875	27.25	29.125	33.25	35.25	36.625	37.25	37.75	38.75	39.25	39.625	39.875	40.125	41.375	41.375	41.875	42.125	42.375
	standard dev.	1.10868	3.94493	4.47912	4.90535	6.33114	6.01907	5.26783	5.63471	5.12144	4.90748	5.72276	5.97913	5.33073	5.26585	5.37548	5.12144	5.2341	5.2341	5.4064	5.61805	5.2341
	DBD2_1	0	12	20	20	26	26	28	28	32	50	41	32	32	32	32	32	34	34	34	34	50
	DBD2_2	0	22	32	34	40	40	48	54	54	56	58	60	60	60	60	60	60	60	60	60	60
	DBD2_3	4	18	24	28	36	38	46	50	50	54	60	64	66	66	66	66	70	70	70	70	70
	DBD2_4	2	28	28	32	42	44	54	58	60	62	64	66	66	66	66	66	66	66	66	66	66
	Average	1.5	20	26	28.5	36	37	44	47.5	49	55.5	55.75	55.5	56	56	56	56	57.5	57.5	57.5	57.5	61.5
	standard dev.	1.91485	6.733	5.16398	6.19139	7.11805	7.74597	11.1952	13.404	12.0554	5	10.1448	15.864	16.2481	16.2481	16.2481	16.2481	16.1967	16.1967	16.1967	16.1967	8.69866
	DBD5_1	8	32	36	36	40	40	48	52	52	52	52	56	56	56	56	58	62	62	62	62	62
	DBD5_2	6	24	24	26	26	30	34	38	40	50	42	46	46	48	50	50	54	54	54	54	54
	DBD5_3	6	18	28	36	46	48	54	60	60	60	62	66	66	66	66	66	72	72	72	72	72
	DBD5_4	2	20	32	38	44	48	56	60	60	62	62	68	68	68	68	68	72	72	72	72	72
	Average	5.5	23.5	30	34	39	41.5	48	52.5	53	56	54.5	59	59	59.5	60	60.5	65	65	65	65	65
	standard dev.	2.51661	6.19139	5.16398	5.41603	9.0185	8.544	9.93311	10.3763	9.45163	5.88784	9.57427	10.1325	10.1325	9.29157	8.48528	8.22598	8.7178	8.7178	8.7178	8.7178	8.7178
	DBD10_1	3	21	26	33	37	39	39	40	41	41	41	41	41	41	41	41	41	41	41	41	41
	DBD10_2	4	19	24	29	35	36	36	36	36	37	37	37	37	37	37	37	37	37	37	37	37
	DBD10_3	3	19	24	29	37	38	38	39	39	40	40	40	40	40	40	40	40	40	40	40	40
	DBD10_4	1	21	25	32	38	39	41	42	44	44	44	44	44	44	44	44	44	44	45	46	46
	Average	2.75	20	24.75	30.75	36.75	38	38.5	39.25	40	40.5	40.5	40.5	40.5	40.5	40.5	40.5	40.5	40.5	40.75	41	41
	standard dev.	1.25831	1.1547	0.957427	2.06155	1.25831	1.41421	2.08167	2.5	3.3665	2.88675	2.88675	2.88675	2.88675	2.88675	2.88675	2.88675	2.88675	2.88675	3.30404	3.74166	3.74166
	DBD15_1	1	17	23	26	32	33	33	39	39	40	40	40	40	40	41	41	41	42	42	42	42
	DBD15_2	3	20	25	30	38	39	39	43	45	45	45	45	45	45	45	45	46	46	46	46	46
	DBD15_3	3	20	26	30	32	33	33	33	33	33	33	33	33	33	33	33	33	33	33	33	33
	DBD15_4	5	20	26	31	37	37	37	38	38	38	38	38	38	38	39	39	39	39	39	39	39
	Average	3	19.25	25	29.25	34.75	35.5	35.5	38.25	38.75	39	39	39	39	39	39.5	39.5	39.75	40	40	40	40
	standard dev.	1.63299	1.5	1.41421	2.21736	3.20156	3	3	4.11299	4.92443	4.96655	4.96655	4.96655	4.96655	4.96655	5	5	5.37742	5.47723	5.47723	5.47723	5.47723
	control_1	0	8.5	10.5	13	20	22.5	27.5	29.5	31	31	33	35	35.5	36	36	36.5	37	37	37	37	37
	control_2	0.5	12	15.5	18	22.5	26	28.5	29.5	30.5	31	33.5	34.5	35	36	36.5	36.5	37	37	37	37	37
	control_3	0	7.5	12.5	17	19.5	22.5	28.5	30.5	30.5	31	33.5	37	37	37	37	37	37.5	37.5	38	38	38
	control_4	0	10.5	12.5	15	17.5	20	24.5	26	26.5	27	29.5	31	32	32.5	32.5	32.5	33	33	33	33	33
	Average	0.125	9.625	12.75	15.75	19.875	22.75	27.25	28.875	29.625	30	32.375	34.375	34.875	35.375	35.5	35.625	36.125	36.125	36.25	36.25	36.25
	standard dev.	0.25	2.01556	2.06155	2.21736	2.05649	2.46644	1.89297	1.97379	2.09662	2	1.93111	2.49583	2.09662	1.97379	2.04124	2.09662	2.09662	2.09662	2.21736	2.21736	2.21736
